# Supplementary material
Source: PubMed Central journal article supplement (PMC6696938)

● melatonin    ▲ ramelteon    ◆ 2-iodomelatonin  
 ▲ 2-pmt    ■ agomelatine

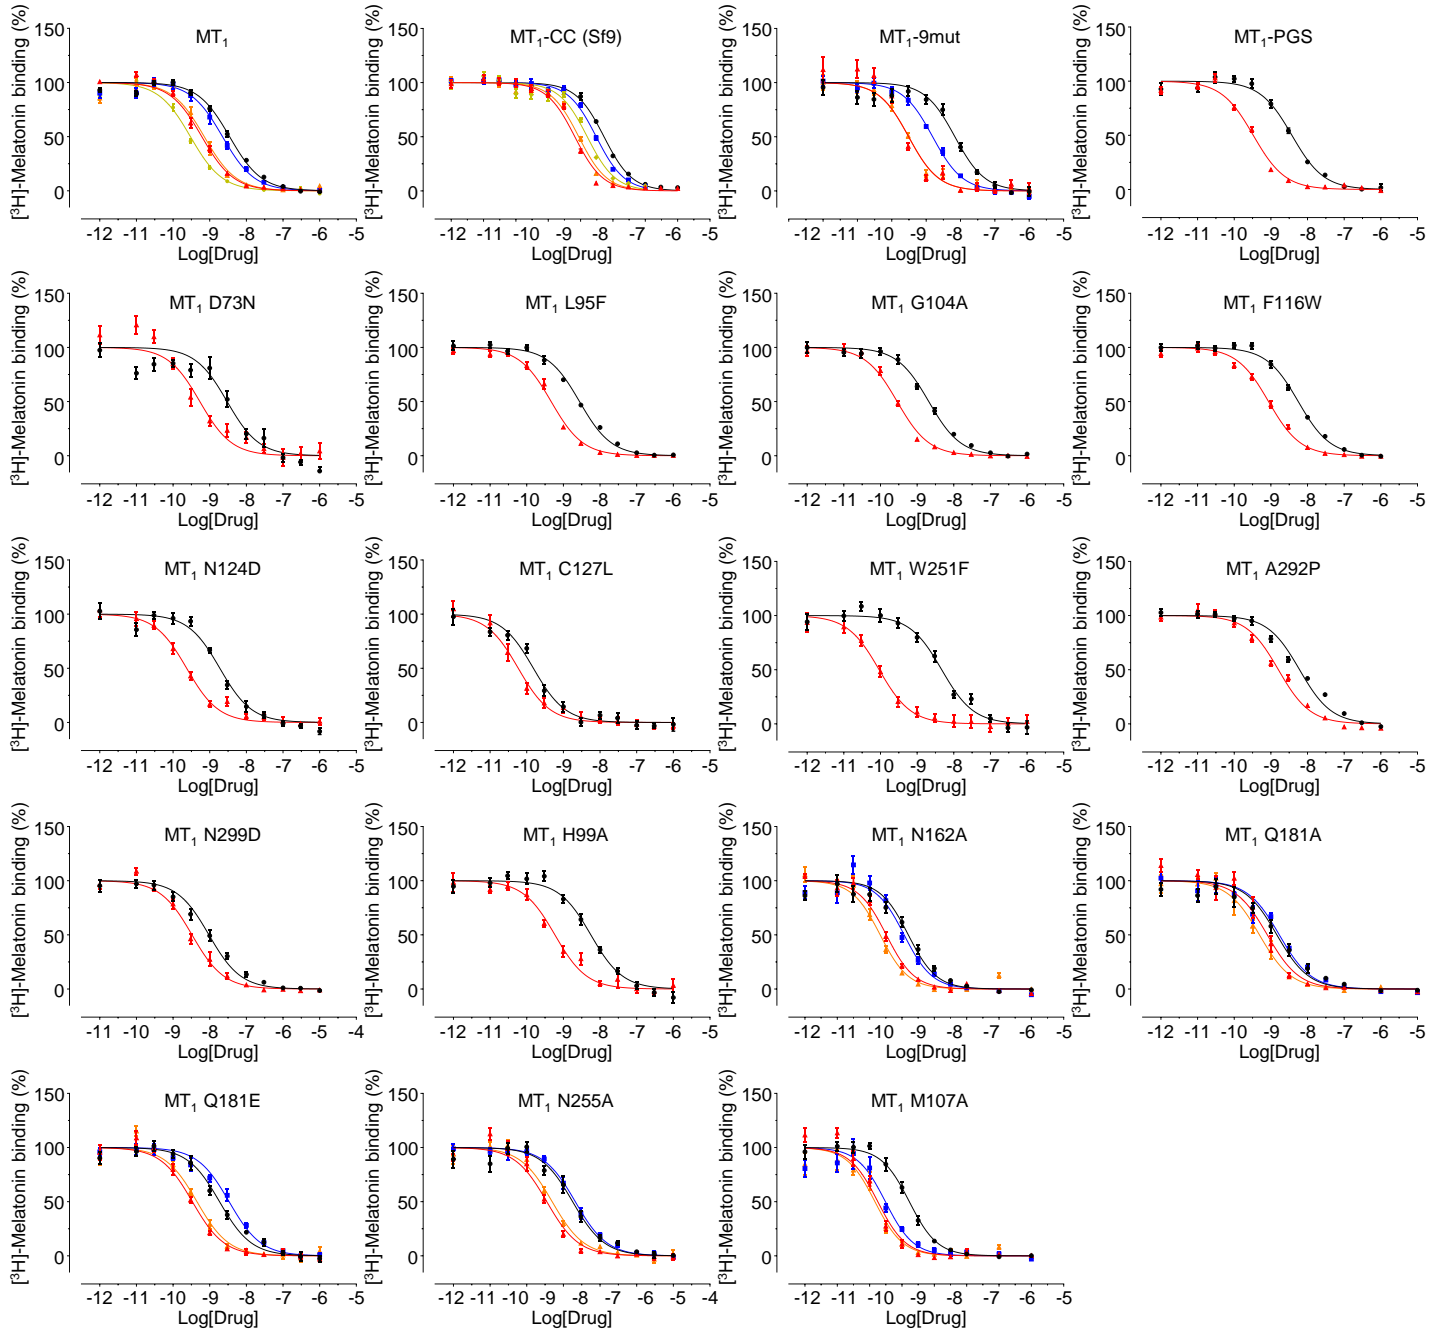

Supplement: NIHMS1525418-supplement-SI_Figure_1.pdf [file NIHMS1525418-supplement-SI_Figure_1.pdf]

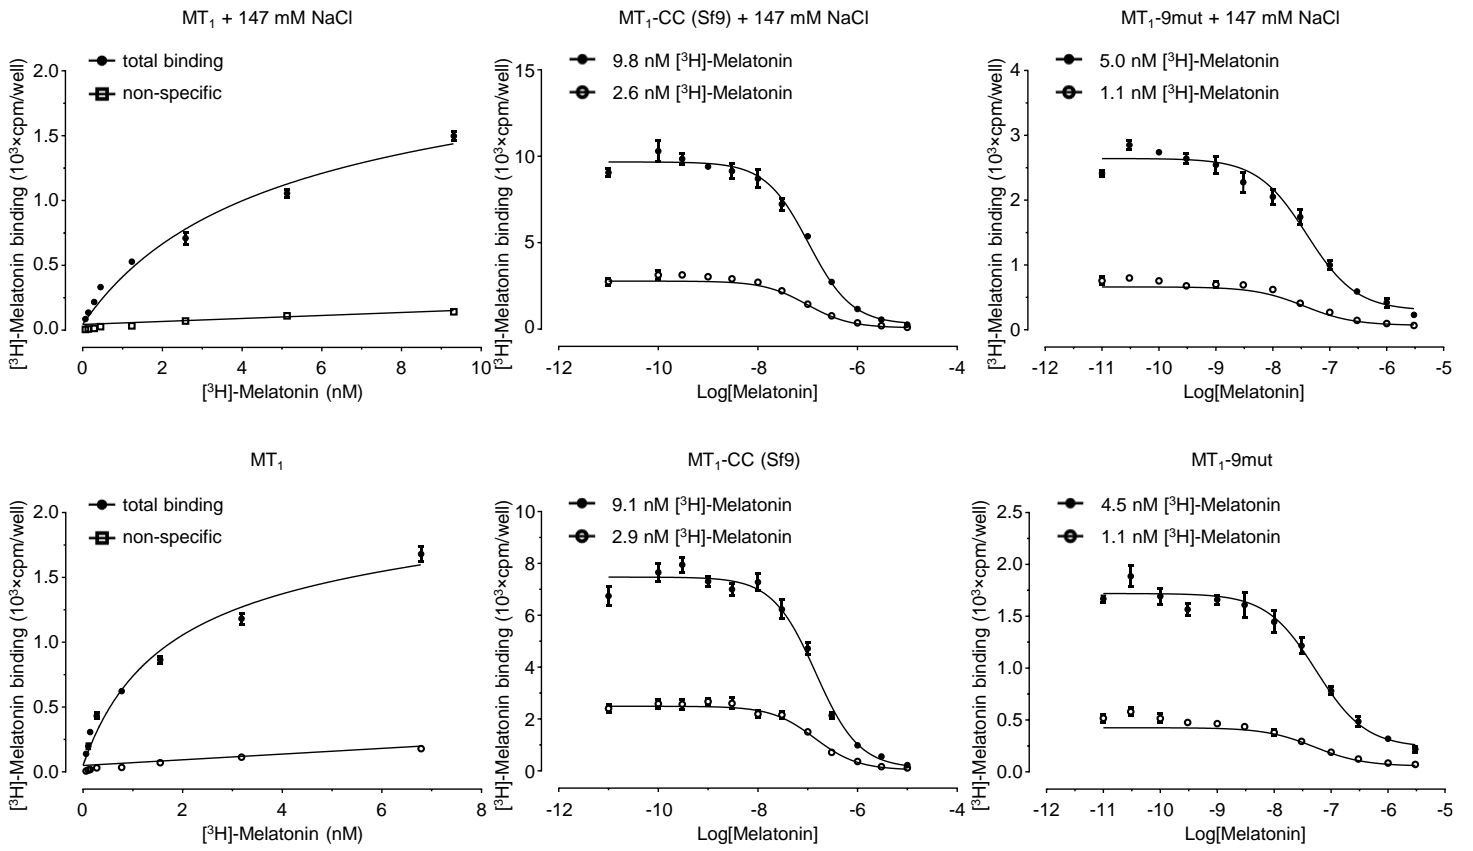

Supplement: NIHMS1525418-supplement-SI_Figure_2.pdf [file NIHMS1525418-supplement-SI_Figure_2.pdf]

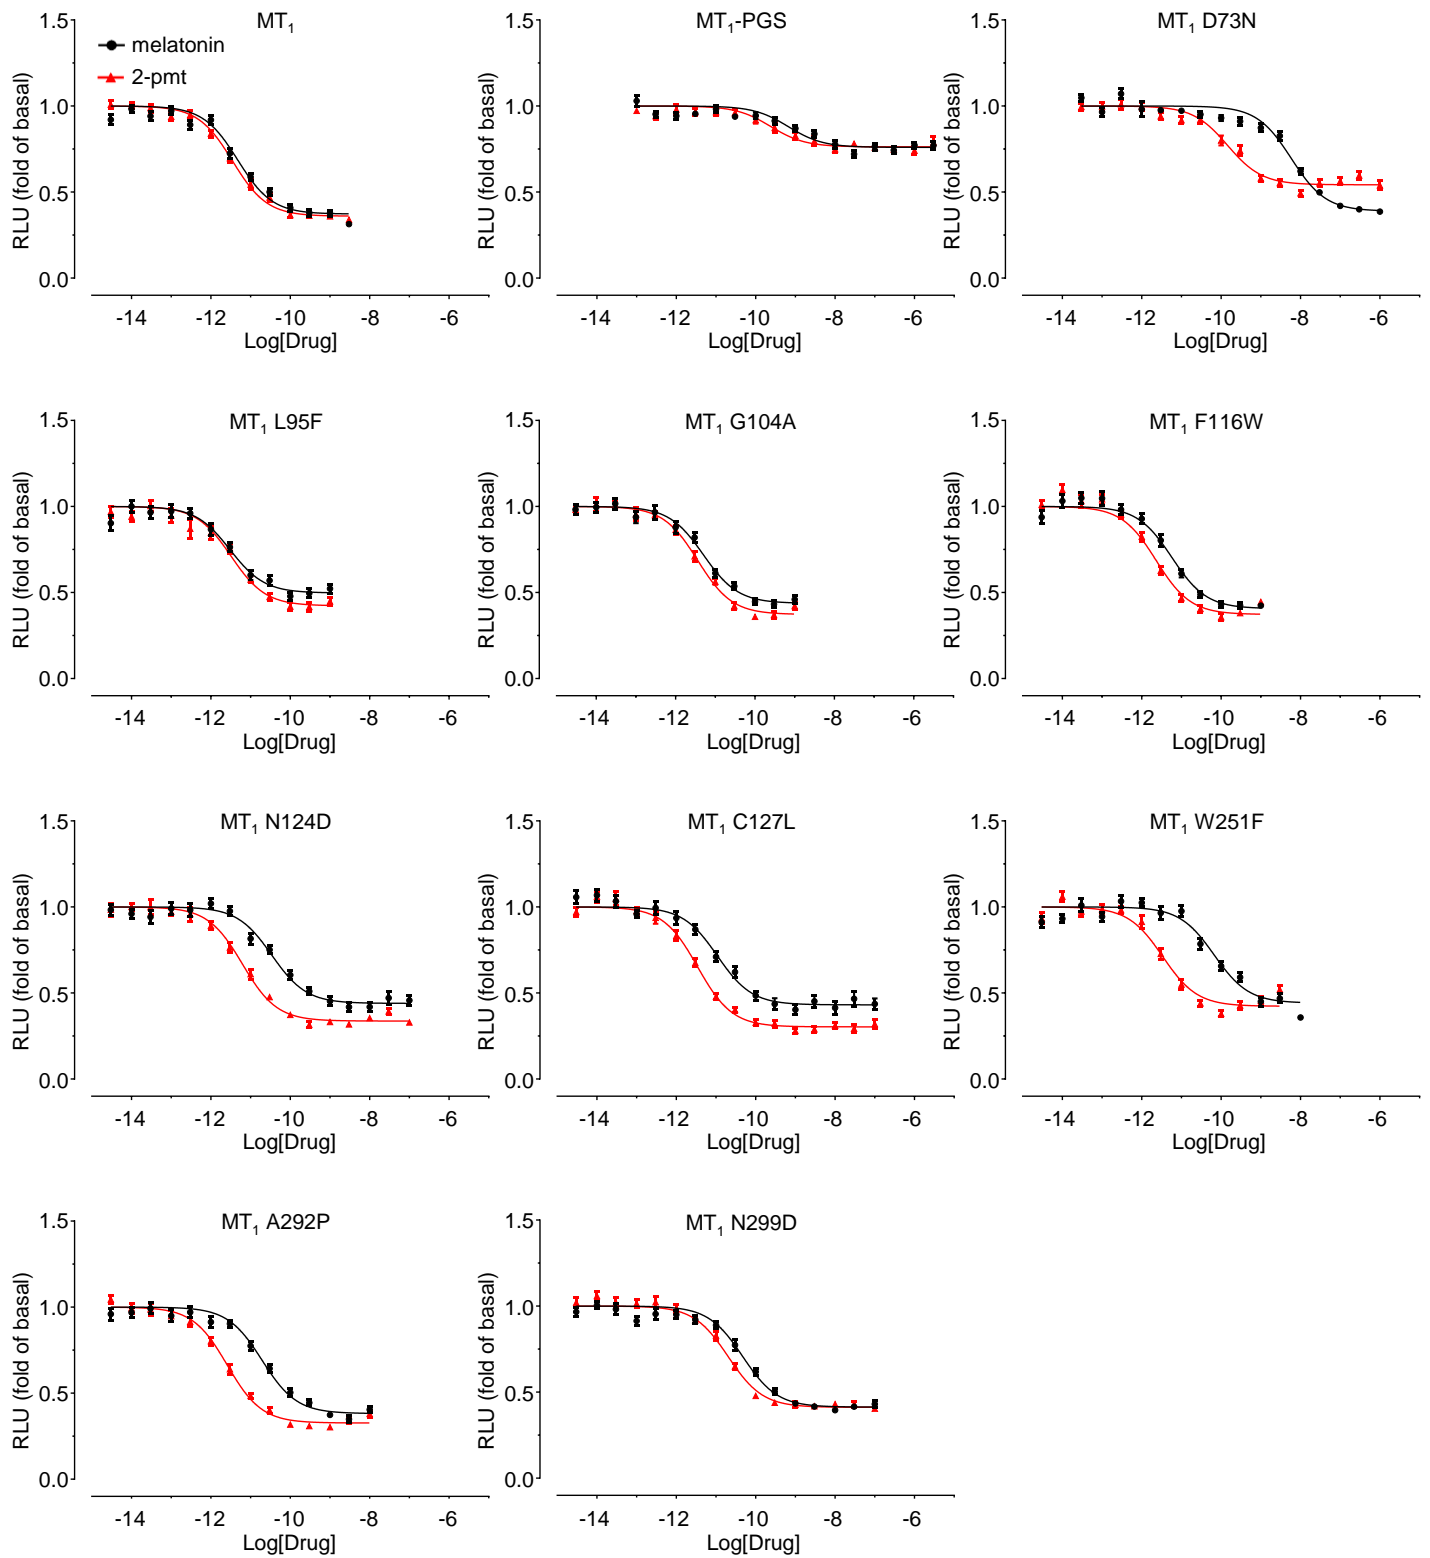

Supplement: NIHMS1525418-supplement-SI_Figure_3.pdf [file NIHMS1525418-supplement-SI_Figure_3.pdf]

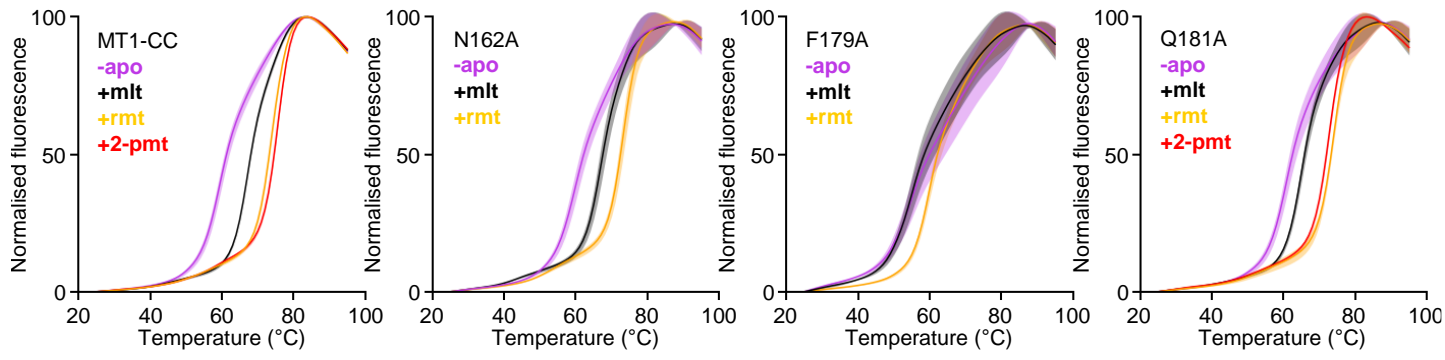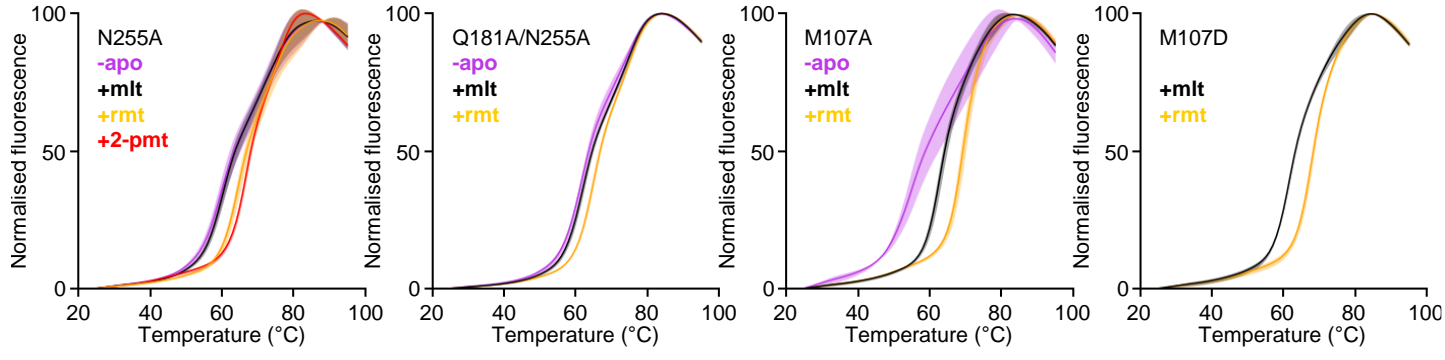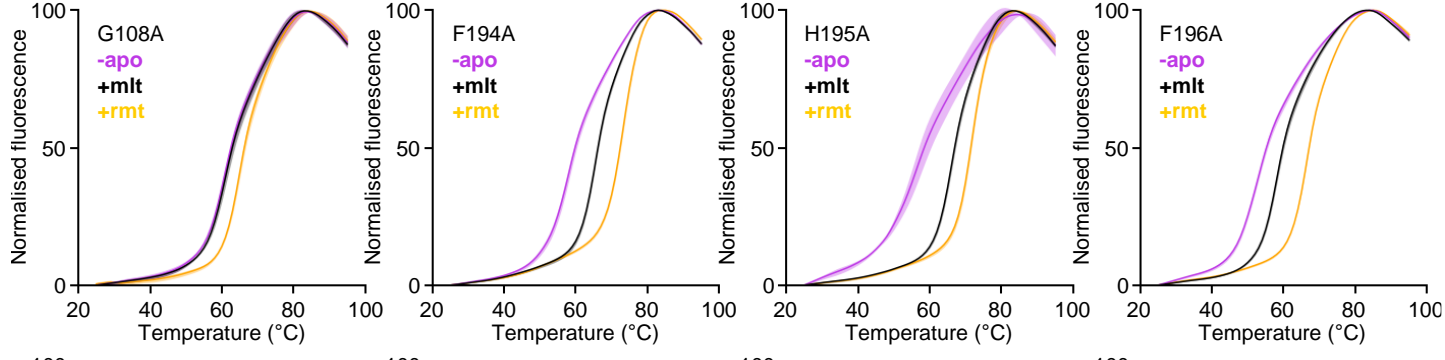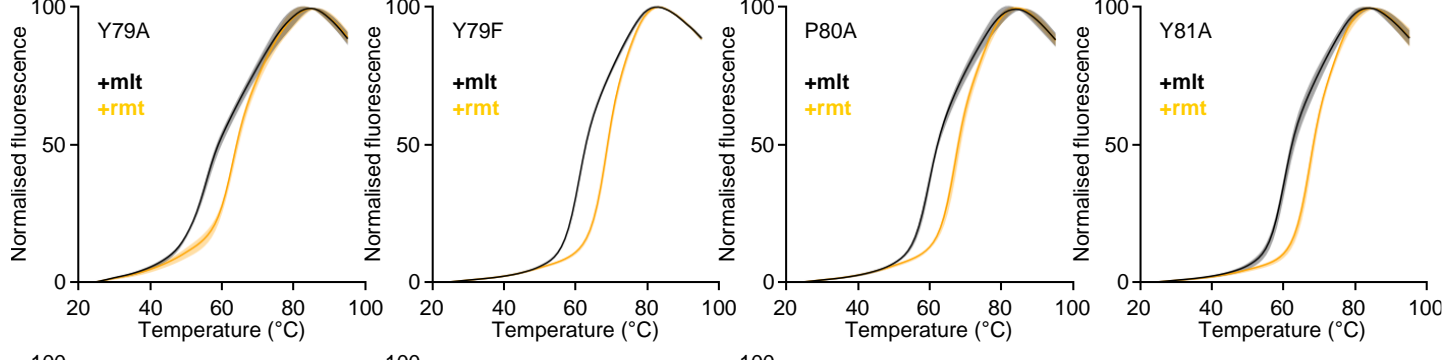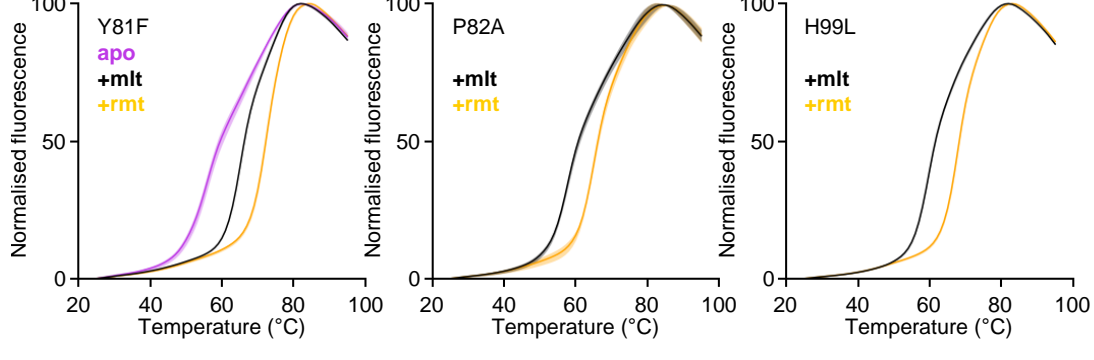

Supplement: NIHMS1525418-supplement-SI_Figure_4.pdf [file NIHMS1525418-supplement-SI_Figure_4.pdf]

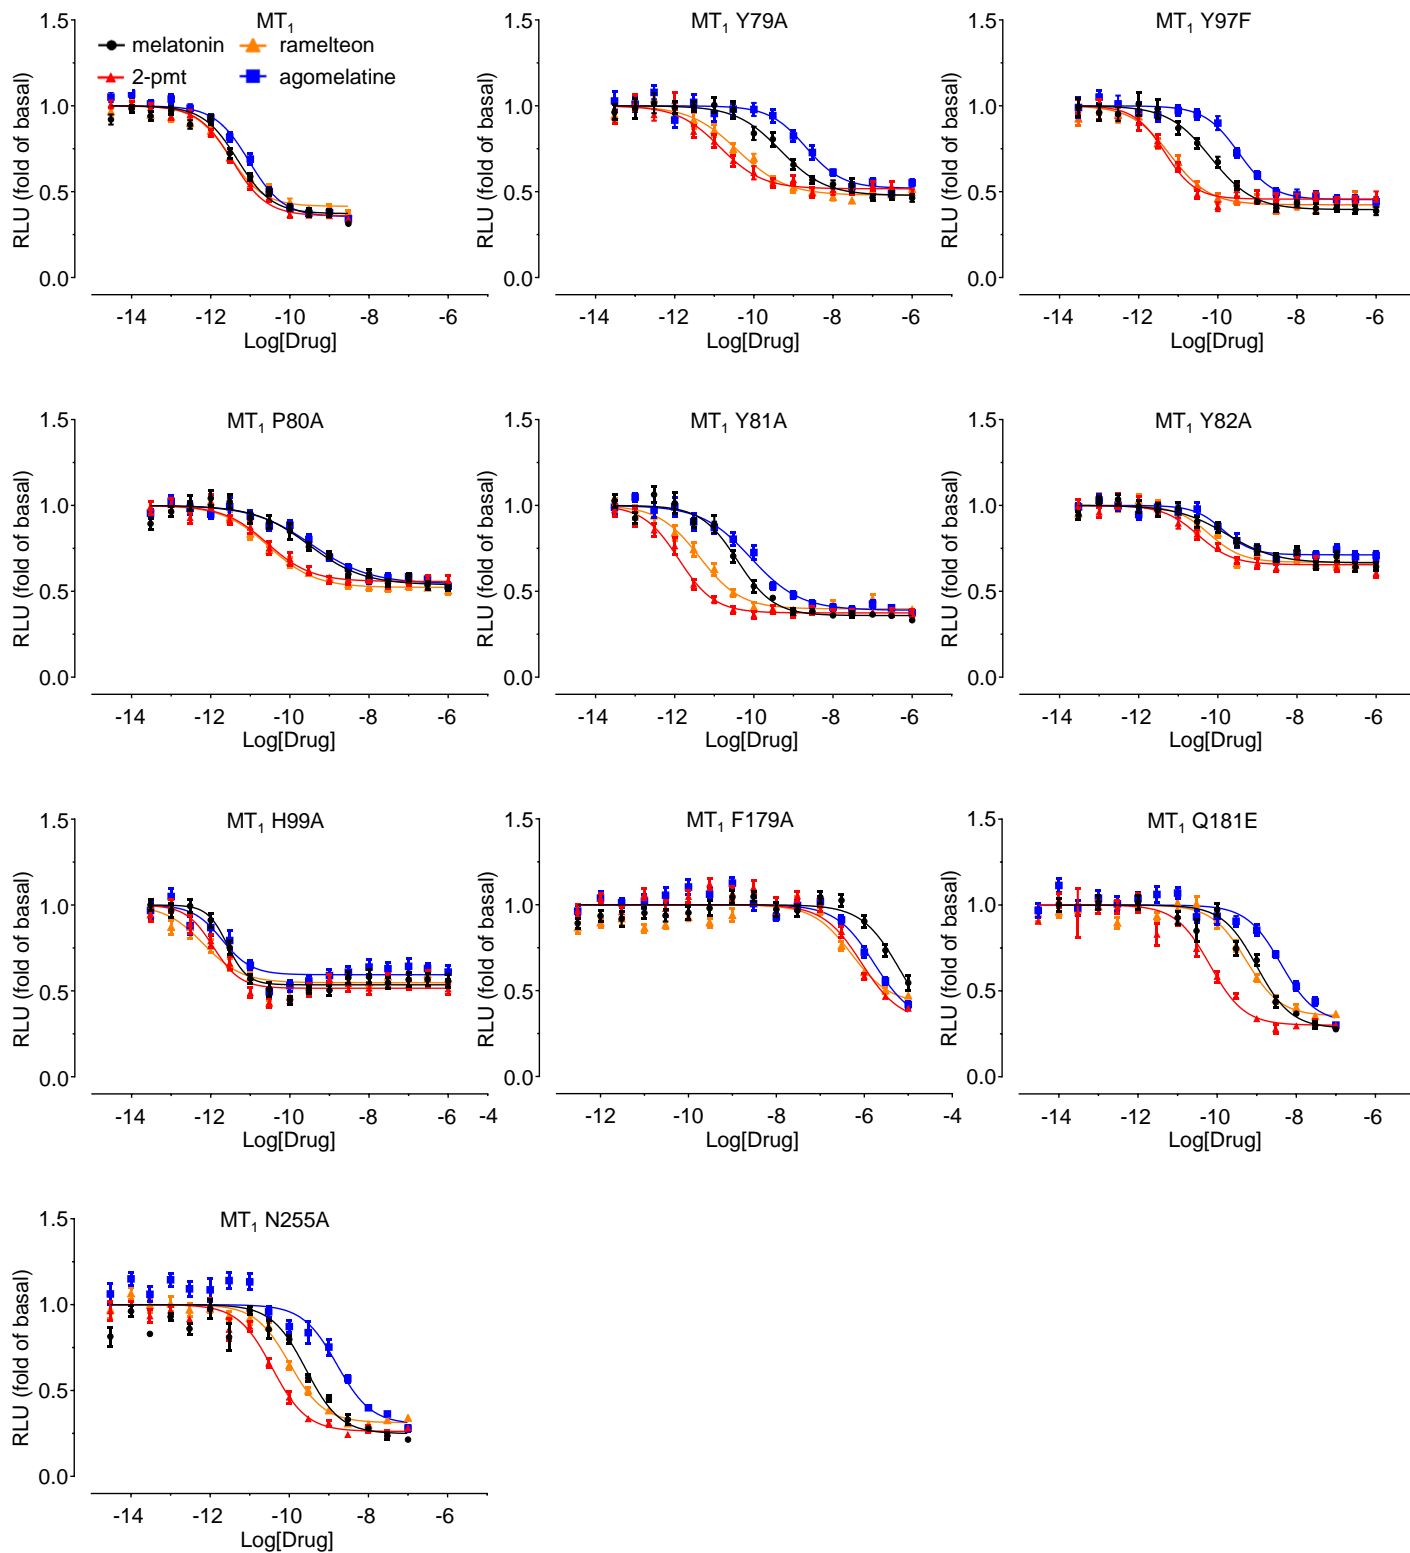

Supplement: NIHMS1525418-supplement-SI_Figure_5.pdf [file NIHMS1525418-supplement-SI_Figure_5.pdf]

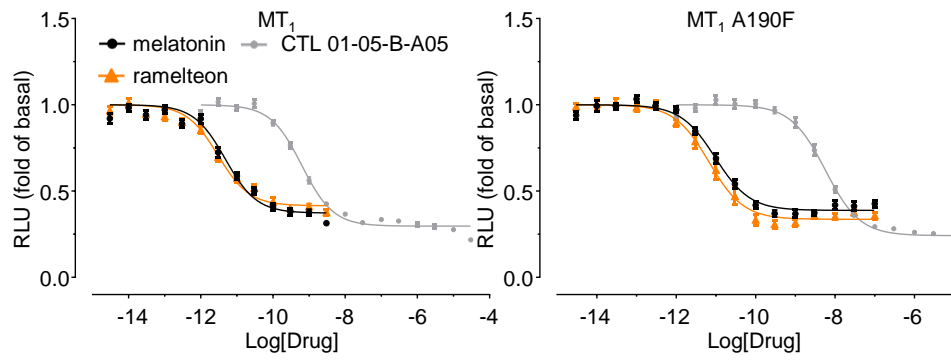

Supplement: NIHMS1525418-supplement-SI_Figure_6.pdf [file NIHMS1525418-supplement-SI_Figure_6.pdf]

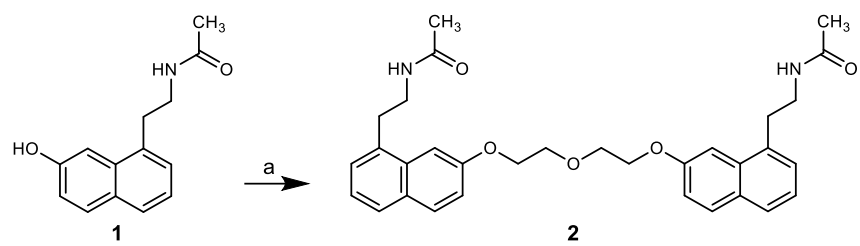

Supplement: NIHMS1525418-supplement-SI_Figure_7.pdf [file NIHMS1525418-supplement-SI_Figure_7.pdf]

**a**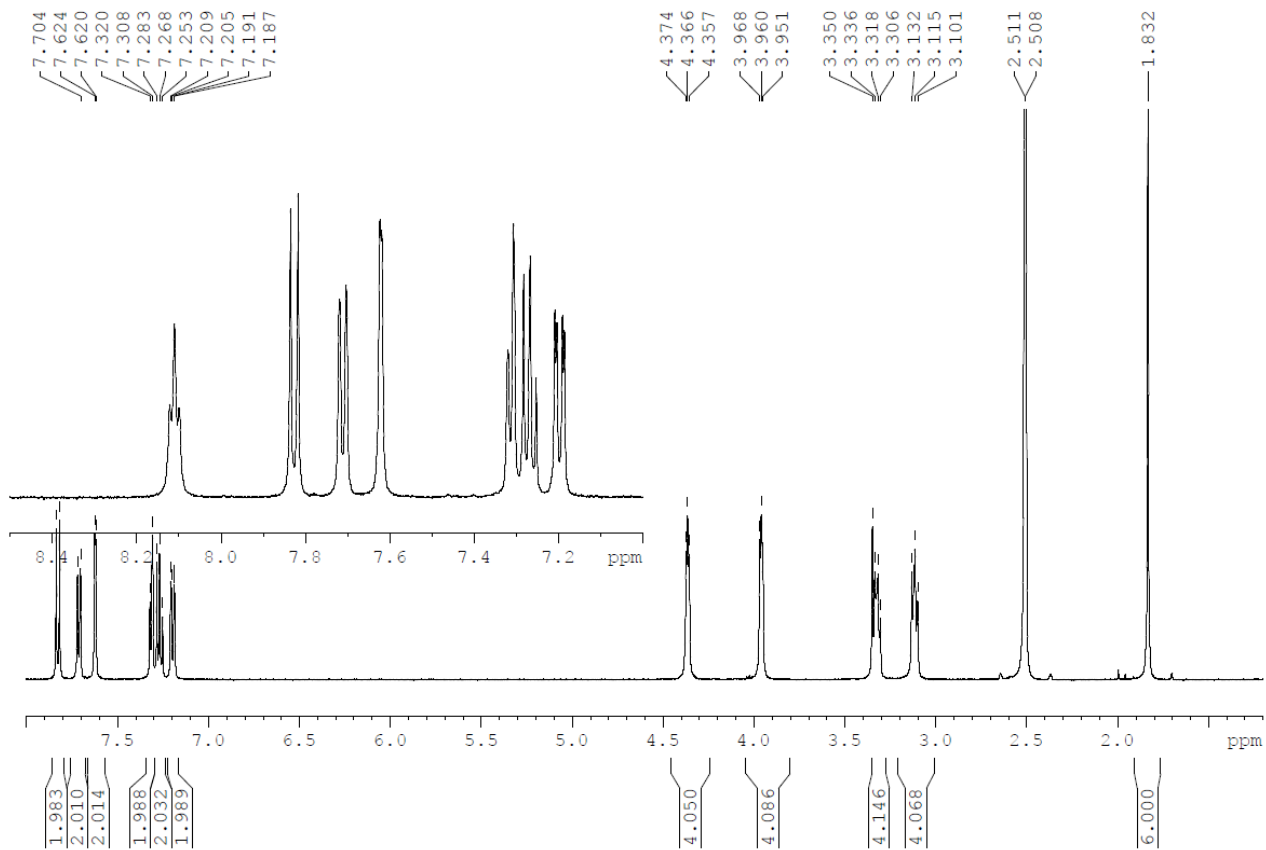**b**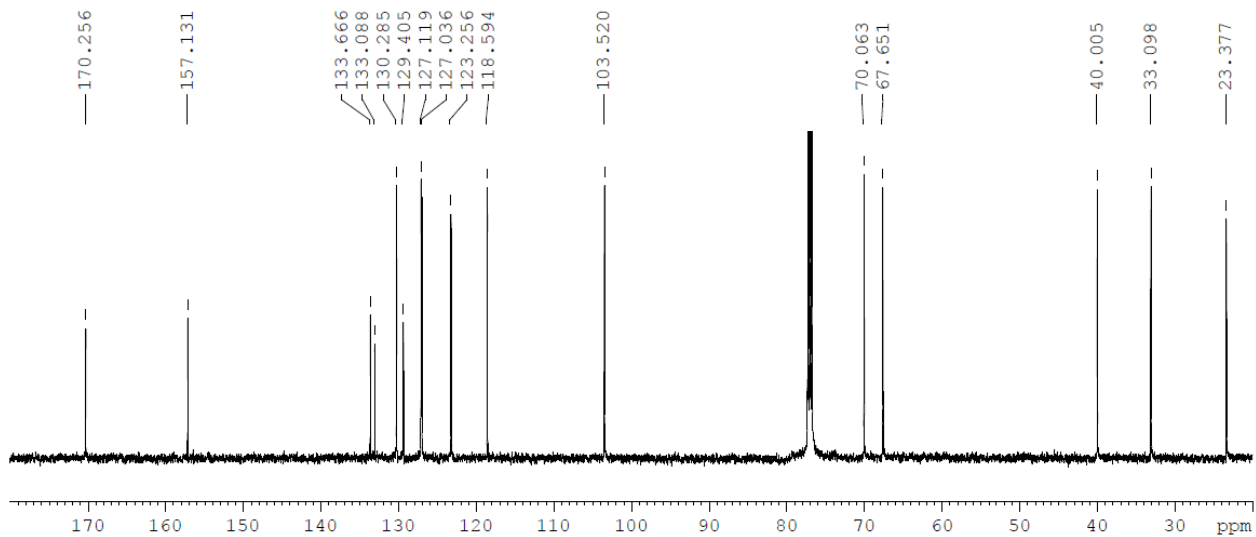

Supplement: NIHMS1525418-supplement-SI_Figure_8.pdf [file NIHMS1525418-supplement-SI_Figure_8.pdf]
